# Supplementary material for: RETRACTED: Genome-wide identification of RETINOBLASTOMA RELATED 1 binding sites in Arabidopsis reveals novel DNA damage regulators
Source: PubMed Central journal article supplement (PMC6268010; doi:10.1371/journal.pgen.1007797), 2018-11-30
Supplement: pgen.1007797.s008.pdf [file pgen.1007797.s008.pdf]

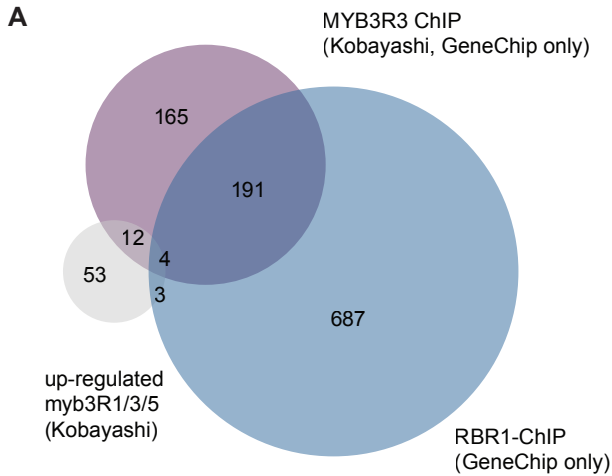

**B**

**Analysis Type:** PANTHER Overrepresentation Test (release 20160715)  
**Annotation Version and Release Date:** PANTHER version 11.1 Released 2016-10-24

**MYB3R3 and RBR1 overlap**

| PANTHER GO-Slim Biological Process                            | REFLIST (27352) | MYB3R3 & RBR1 (212) | fold Enrichment | P-value  |
|---------------------------------------------------------------|-----------------|---------------------|-----------------|----------|
| DNA replication (GO:0006260)                                  | 145             | 17                  | 15.13           | 7.06E-13 |
| chromatin organization (GO:0006325)                           | 194             | 22                  | 14.63           | 1.11E-16 |
| chromosome segregation (GO:0007059)                           | 84              | 7                   | 10.75           | 9.10E-04 |
| DNA recombination (GO:0006310)                                | 60              | 5                   | 10.75           | 2.10E-02 |
| DNA repair (GO:0006281)                                       | 211             | 14                  | 8.56            | 3.08E-07 |
| mitosis (GO:0007067)                                          | 303             | 18                  | 7.66            | 8.08E-09 |
| cell cycle (GO:0007049)                                       | 455             | 21                  | 5.95            | 1.85E-08 |
| nucleobase-containing compound metabolic process (GO:0006139) | 573             | 23                  | 5.18            | 3.40E-08 |

**RBR1 only**

| PANTHER GO-Slim Biological Process               | REFLIST (27352) | RBR1 only (715) | fold Enrichment | P-value  |
|--------------------------------------------------|-----------------|-----------------|-----------------|----------|
| DNA recombination (GO:0006310)                   | 60              | 14              | 8.93            | 2.33E-07 |
| DNA replication (GO:0006260)                     | 145             | 29              | 7.65            | 2.02E-14 |
| DNA repair (GO:0006281)                          | 211             | 42              | 7.61            | 3.21E-21 |
| chromosome segregation (GO:0007059)              | 84              | 16              | 7.29            | 2.78E-07 |
| meiosis (GO:0007126)                             | 48              | 8               | 6.38            | 8.67E-03 |
| chromatin organization (GO:0006325)              | 194             | 23              | 4.54            | 7.21E-07 |
| mitosis (GO:0007067)                             | 303             | 34              | 4.29            | 6.32E-10 |
| cellular component movement (GO:0006928)         | 163             | 14              | 3.29            | 2.42E-02 |
| cell cycle (GO:0007049)                          | 455             | 31              | 2.61            | 3.88E-04 |
| response to stress (GO:0006950)                  | 718             | 39              | 2.08            | 3.91E-03 |
| nitrogen compound metabolic process (GO:0006807) | 1742            | 78              | 1.71            | 6.09E-04 |

**MYB3R3 only**

| PANTHER GO-Slim Biological Process                           | REFLIST (27352) | MYB3R3 only (185) | fold Enrichment | P-value  |
|--------------------------------------------------------------|-----------------|-------------------|-----------------|----------|
| cellular component movement (GO:0006928)                     | 163             | 10                | 9.07            | 3.92E-05 |
| mitosis (GO:0007067)                                         | 303             | 11                | 5.37            | 1.50E-03 |
| phosphate-containing compound metabolic process (GO:0006796) | 1003            | 19                | 2.8             | 1.03E-02 |
