# Supplementary material for: RETRACTED: Genome-wide identification of RETINOBLASTOMA RELATED 1 binding sites in Arabidopsis reveals novel DNA damage regulators
Source: PubMed Central journal article supplement (PMC6268010; doi:10.1371/journal.pgen.1007797), 2018-11-30
Supplement: pgen.1007797.s020.pdf [file pgen.1007797.s020.pdf]

## A. TE associated motifs

MEME version 4.11.2

ALPHABET= ACGT

strands: + -

Background letter frequencies (from unknown source):

A 0.347 C 0.153 G 0.153 T 0.347

### TE\_MOTIF\_1

letter-probability matrix: alength= 4 w= 15 nsites= 50 E= 9.3e-266

|          |          |          |          |
|----------|----------|----------|----------|
| 0.000000 | 1.000000 | 0.000000 | 0.000000 |
| 0.000000 | 0.000000 | 1.000000 | 0.000000 |
| 0.000000 | 0.000000 | 0.460000 | 0.540000 |
| 0.000000 | 0.000000 | 0.000000 | 1.000000 |
| 0.000000 | 0.000000 | 0.000000 | 1.000000 |
| 0.000000 | 0.000000 | 0.000000 | 1.000000 |
| 0.000000 | 0.000000 | 0.000000 | 1.000000 |
| 0.000000 | 0.000000 | 1.000000 | 0.000000 |
| 0.000000 | 0.000000 | 1.000000 | 0.000000 |
| 0.000000 | 1.000000 | 0.000000 | 0.000000 |
| 0.000000 | 0.000000 | 1.000000 | 0.000000 |
| 0.000000 | 0.000000 | 1.000000 | 0.000000 |
| 0.000000 | 0.000000 | 1.000000 | 0.000000 |
| 1.000000 | 0.000000 | 0.000000 | 0.000000 |
| 1.000000 | 0.000000 | 0.000000 | 0.000000 |

MEME version 4.11.2

ALPHABET= ACGT

strands: + -

Background letter frequencies (from unknown source):

A 0.347 C 0.153 G 0.153 T 0.347

### TE\_MOTIF\_2

letter-probability matrix: alength= 4 w= 21 nsites= 50 E= 1.8e-173

|          |          |          |          |
|----------|----------|----------|----------|
| 0.140000 | 0.000000 | 0.680000 | 0.180000 |
| 0.160000 | 0.000000 | 0.000000 | 0.840000 |
| 0.980000 | 0.000000 | 0.020000 | 0.000000 |
| 0.980000 | 0.000000 | 0.000000 | 0.020000 |
| 1.000000 | 0.000000 | 0.000000 | 0.000000 |
| 0.000000 | 0.080000 | 0.000000 | 0.920000 |
| 0.180000 | 0.700000 | 0.000000 | 0.120000 |
| 0.020000 | 0.280000 | 0.000000 | 0.700000 |
| 0.000000 | 0.000000 | 0.000000 | 1.000000 |
| 0.020000 | 0.000000 | 0.040000 | 0.940000 |
| 0.000000 | 0.060000 | 0.020000 | 0.920000 |
| 0.800000 | 0.000000 | 0.000000 | 0.200000 |
| 1.000000 | 0.000000 | 0.000000 | 0.000000 |
| 1.000000 | 0.000000 | 0.000000 | 0.000000 |
| 0.820000 | 0.000000 | 0.140000 | 0.040000 |
| 0.160000 | 0.740000 | 0.020000 | 0.080000 |
| 0.120000 | 0.820000 | 0.000000 | 0.060000 |
| 0.040000 | 0.780000 | 0.000000 | 0.180000 |
| 0.000000 | 0.260000 | 0.000000 | 0.740000 |
| 0.000000 | 0.000000 | 0.000000 | 1.000000 |
| 0.000000 | 0.000000 | 0.000000 | 1.000000 |

MEME version 4.11.2

ALPHABET= ACGT

strands: + -

Background letter frequencies (from unknown source):

A 0.347 C 0.153 G 0.153 T 0.347

### TE\_MOTIF\_3

letter-probability matrix: alength= 4 w= 15 nsites= 50 E= 7.1e-172

|          |          |          |          |
|----------|----------|----------|----------|
| 0.980000 | 0.000000 | 0.020000 | 0.000000 |
| 0.000000 | 0.000000 | 0.000000 | 1.000000 |
| 0.000000 | 0.000000 | 0.000000 | 1.000000 |
| 0.000000 | 0.000000 | 0.000000 | 1.000000 |
| 1.000000 | 0.000000 | 0.000000 | 0.000000 |
| 0.000000 | 1.000000 | 0.000000 | 0.000000 |
| 1.000000 | 0.000000 | 0.000000 | 0.000000 |
| 1.000000 | 0.000000 | 0.000000 | 0.000000 |
| 0.000000 | 0.000000 | 1.000000 | 0.000000 |
| 0.200000 | 0.000000 | 0.760000 | 0.040000 |
| 0.000000 | 0.000000 | 1.000000 | 0.000000 |
| 0.840000 | 0.000000 | 0.000000 | 0.160000 |
| 0.000000 | 0.000000 | 0.000000 | 1.000000 |
| 0.000000 | 0.000000 | 0.000000 | 1.000000 |
| 0.000000 | 0.000000 | 0.000000 | 1.000000 |

## B. Gene associated motifs

MEME version 4.11.4

ALPHABET= ACGT

strands: + -

Background letter frequencies (from unknown source):

A 0.320 C 0.180 G 0.180 T 0.320

### GENE\_MOTIF\_1

letter-probability matrix: alength= 4 w= 15 nsites= 50 E= 1.9e-108

|          |          |          |          |
|----------|----------|----------|----------|
| 0.040000 | 0.700000 | 0.060000 | 0.200000 |
| 0.020000 | 0.100000 | 0.160000 | 0.720000 |
| 0.020000 | 0.840000 | 0.060000 | 0.080000 |
| 0.100000 | 0.160000 | 0.020000 | 0.720000 |
| 0.000000 | 0.960000 | 0.040000 | 0.000000 |
| 0.060000 | 0.000000 | 0.000000 | 0.940000 |
| 0.020000 | 0.760000 | 0.020000 | 0.200000 |
| 0.000000 | 0.000000 | 0.000000 | 1.000000 |
| 0.000000 | 1.000000 | 0.000000 | 0.000000 |
| 0.040000 | 0.040000 | 0.000000 | 0.920000 |
| 0.020000 | 0.700000 | 0.160000 | 0.120000 |
| 0.000000 | 0.060000 | 0.080000 | 0.860000 |
| 0.000000 | 0.980000 | 0.000000 | 0.020000 |
| 0.000000 | 0.000000 | 0.020000 | 0.980000 |
| 0.000000 | 0.940000 | 0.060000 | 0.000000 |

MEME version 4.11.4

ALPHABET= ACGT

strands: + -

Background letter frequencies (from unknown source):

A 0.320 C 0.180 G 0.180 T 0.320

**GENE\_MOTIF\_2**

letter-probability matrix: alength= 4 w= 11 nsites= 50 E= 9.6e-089

|          |          |          |          |
|----------|----------|----------|----------|
| 0.140000 | 0.000000 | 0.120000 | 0.740000 |
| 0.000000 | 0.000000 | 1.000000 | 0.000000 |
| 0.000000 | 0.000000 | 1.000000 | 0.000000 |
| 0.000000 | 1.000000 | 0.000000 | 0.000000 |
| 0.000000 | 0.000000 | 1.000000 | 0.000000 |
| 0.000000 | 0.000000 | 1.000000 | 0.000000 |
| 0.000000 | 0.000000 | 1.000000 | 0.000000 |
| 1.000000 | 0.000000 | 0.000000 | 0.000000 |
| 1.000000 | 0.000000 | 0.000000 | 0.000000 |
| 0.880000 | 0.040000 | 0.060000 | 0.020000 |
| 0.620000 | 0.080000 | 0.060000 | 0.240000 |

MEME version 4.11.4

ALPHABET= ACGT

strands: + -

Background letter frequencies (from unknown source):

A 0.320 C 0.180 G 0.180 T 0.320

**GENE\_MOTIF\_3**

letter-probability matrix: alength= 4 w= 15 nsites= 50 E= 9.2e-050

|          |          |          |          |
|----------|----------|----------|----------|
| 0.160000 | 0.200000 | 0.600000 | 0.040000 |
| 0.680000 | 0.000000 | 0.260000 | 0.060000 |
| 0.820000 | 0.060000 | 0.060000 | 0.060000 |
| 0.000000 | 0.000000 | 1.000000 | 0.000000 |
| 1.000000 | 0.000000 | 0.000000 | 0.000000 |
| 0.820000 | 0.160000 | 0.020000 | 0.000000 |
| 0.000000 | 0.000000 | 1.000000 | 0.000000 |
| 0.960000 | 0.000000 | 0.040000 | 0.000000 |
| 0.660000 | 0.100000 | 0.100000 | 0.140000 |
| 0.000000 | 0.000000 | 1.000000 | 0.000000 |
| 0.920000 | 0.000000 | 0.060000 | 0.020000 |
| 0.700000 | 0.080000 | 0.160000 | 0.060000 |
| 0.140000 | 0.060000 | 0.800000 | 0.000000 |
| 0.520000 | 0.160000 | 0.320000 | 0.000000 |
| 0.480000 | 0.180000 | 0.220000 | 0.120000 |

MEME version 4.11.4

ALPHABET= ACGT

strands: + -

Background letter frequencies (from unknown source):

A 0.310 C 0.191 G 0.190 T 0.308

**GENE\_MOTIF\_4**

letter-probability matrix: alength= 4 w= 7 nsites= 56 E= 3.3e-009

|          |          |          |          |
|----------|----------|----------|----------|
| 1.000000 | 0.000000 | 0.000000 | 0.000000 |
| 0.000000 | 1.000000 | 0.000000 | 0.000000 |
| 0.000000 | 0.000000 | 1.000000 | 0.000000 |
| 0.000000 | 0.000000 | 0.000000 | 1.000000 |
| 0.000000 | 0.000000 | 1.000000 | 0.000000 |
| 0.000000 | 0.000000 | 0.553571 | 0.446429 |
| 0.000000 | 1.000000 | 0.000000 | 0.000000 |

MEME version 4.11.4

ALPHABET= ACGT

strands: + -

Background letter frequencies (from unknown source):

A 0.310 C 0.191 G 0.190 T 0.308

**GENE\_MOTIF\_5**

letter-probability matrix: alength= 4 w= 8 nsites= 37 E= 3.2e-005

|          |          |          |          |
|----------|----------|----------|----------|
| 1.000000 | 0.000000 | 0.000000 | 0.000000 |
| 1.000000 | 0.000000 | 0.000000 | 0.000000 |
| 0.000000 | 1.000000 | 0.000000 | 0.000000 |
| 0.000000 | 1.000000 | 0.000000 | 0.000000 |
| 0.000000 | 1.000000 | 0.000000 | 0.000000 |
| 0.000000 | 0.000000 | 0.000000 | 1.000000 |
| 1.000000 | 0.000000 | 0.000000 | 0.000000 |
| 0.756757 | 0.000000 | 0.243243 | 0.000000 |

MEME version 4.11.4

ALPHABET= ACGT

strands: + -

Background letter frequencies (from unknown source):

A 0.310 C 0.191 G 0.190 T 0.308

**GENE\_MOTIF\_6**

letter-probability matrix: alength= 4 w= 7 nsites= 40 E= 2.9e-003

|          |          |          |          |
|----------|----------|----------|----------|
| 0.000000 | 1.000000 | 0.000000 | 0.000000 |
| 0.000000 | 1.000000 | 0.000000 | 0.000000 |
| 0.000000 | 0.000000 | 1.000000 | 0.000000 |
| 0.000000 | 0.000000 | 0.000000 | 1.000000 |
| 0.000000 | 0.000000 | 0.000000 | 1.000000 |
| 1.000000 | 0.000000 | 0.000000 | 0.000000 |
| 0.450000 | 0.550000 | 0.000000 | 0.000000 |
