# Supplementary figures and images for: RETRACTED: Genome-wide identification of RETINOBLASTOMA RELATED 1 binding sites in Arabidopsis reveals novel DNA damage regulators
Source: PubMed Central journal article supplement (PMC6268010; doi:10.1371/journal.pgen.1007797), 2018-11-30

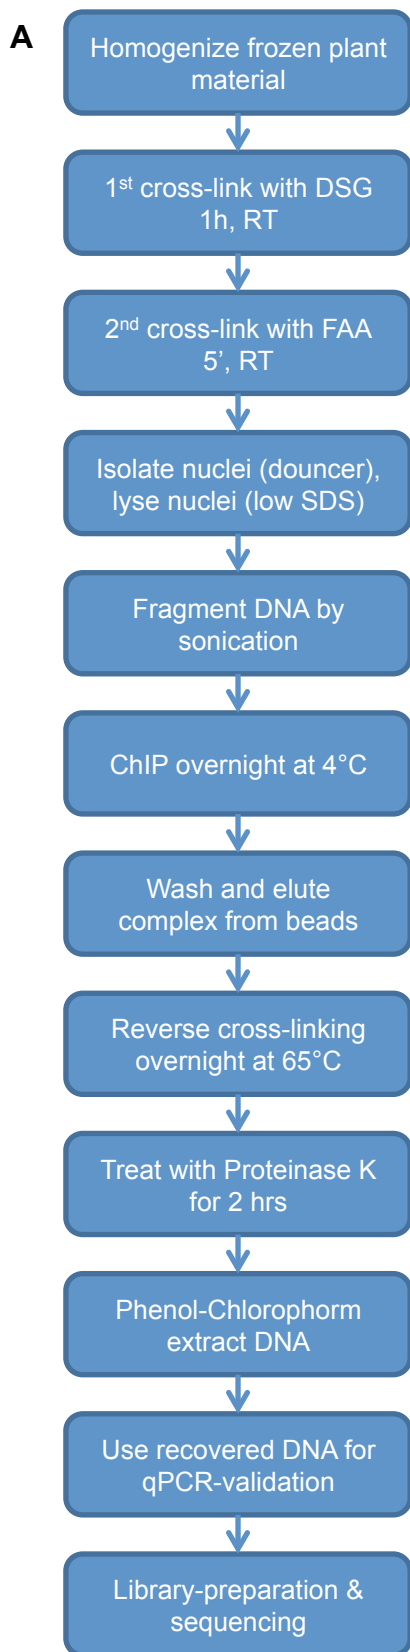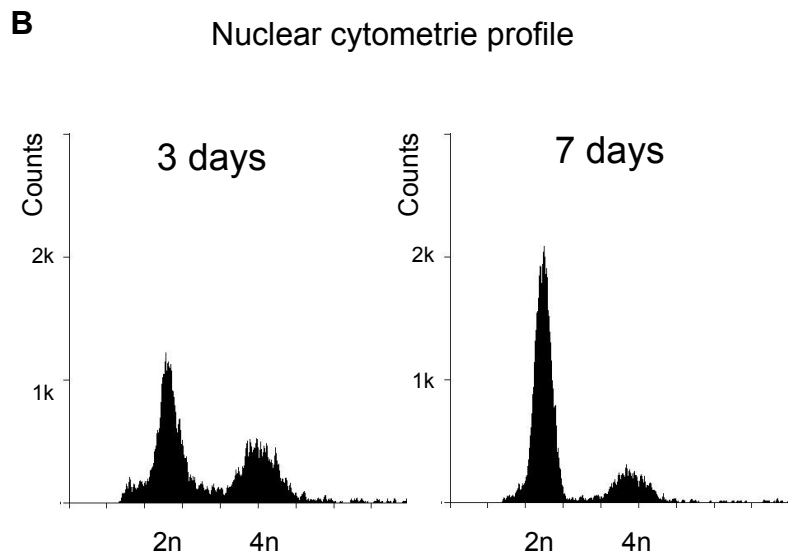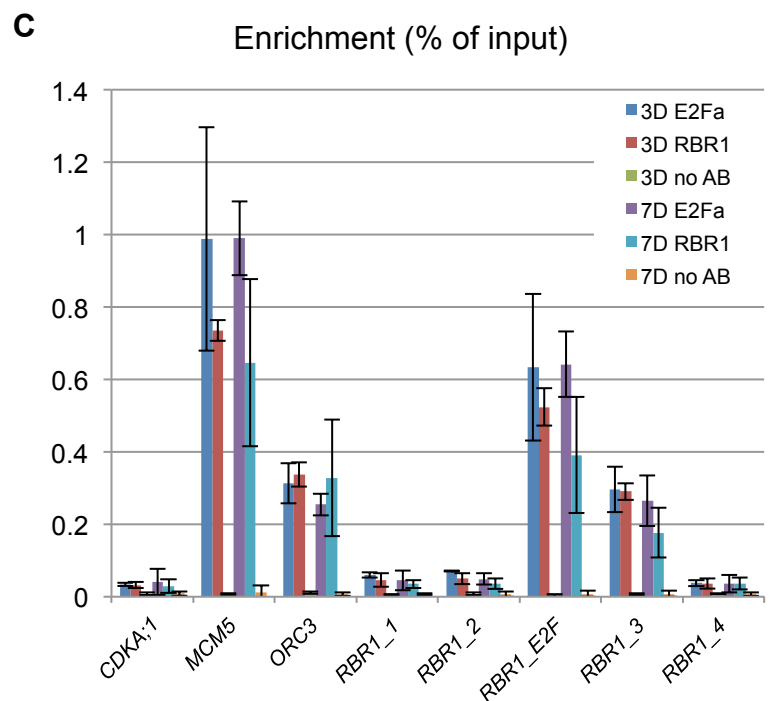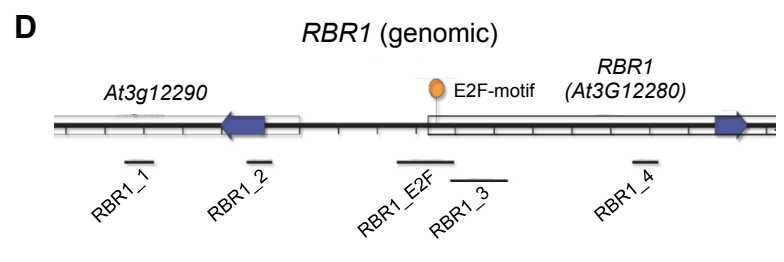

Supplement: pgen.1007797.s001.pdf [file pgen.1007797.s001.pdf]

A

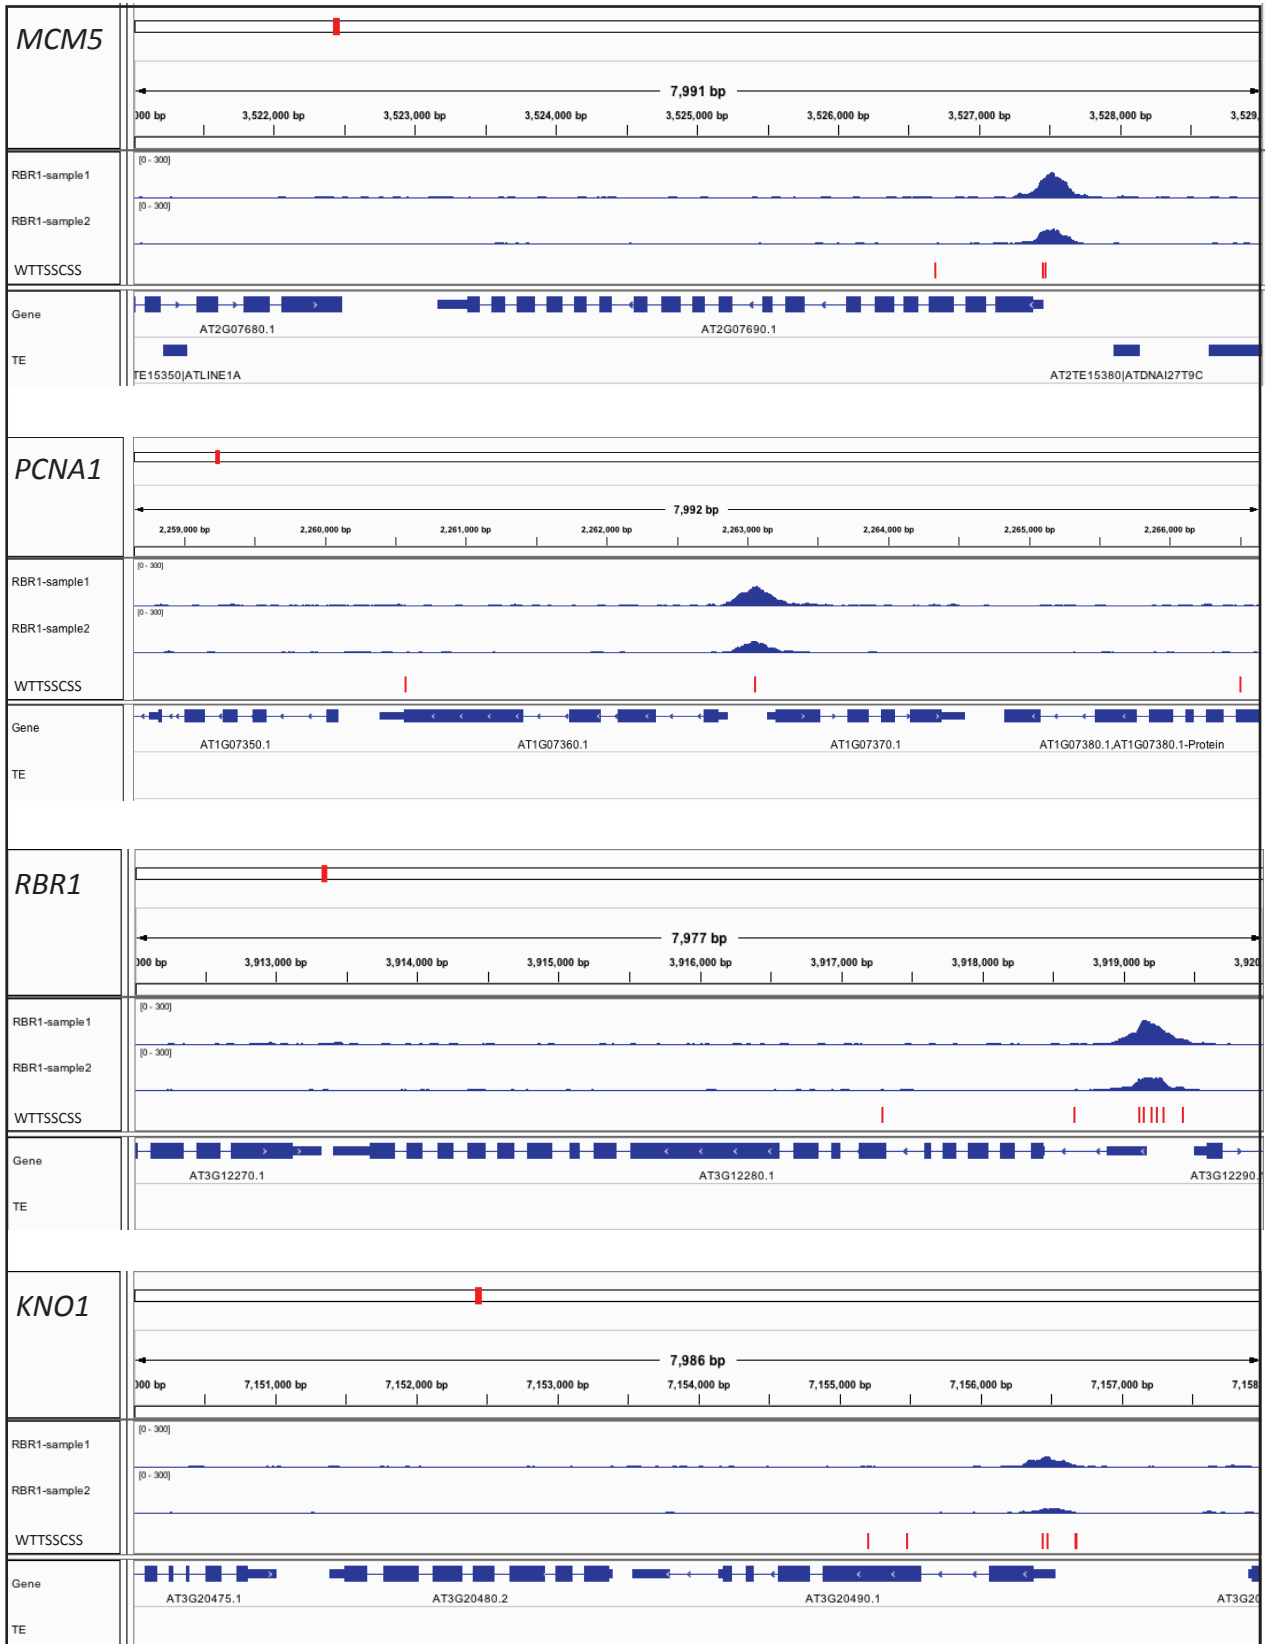

**B**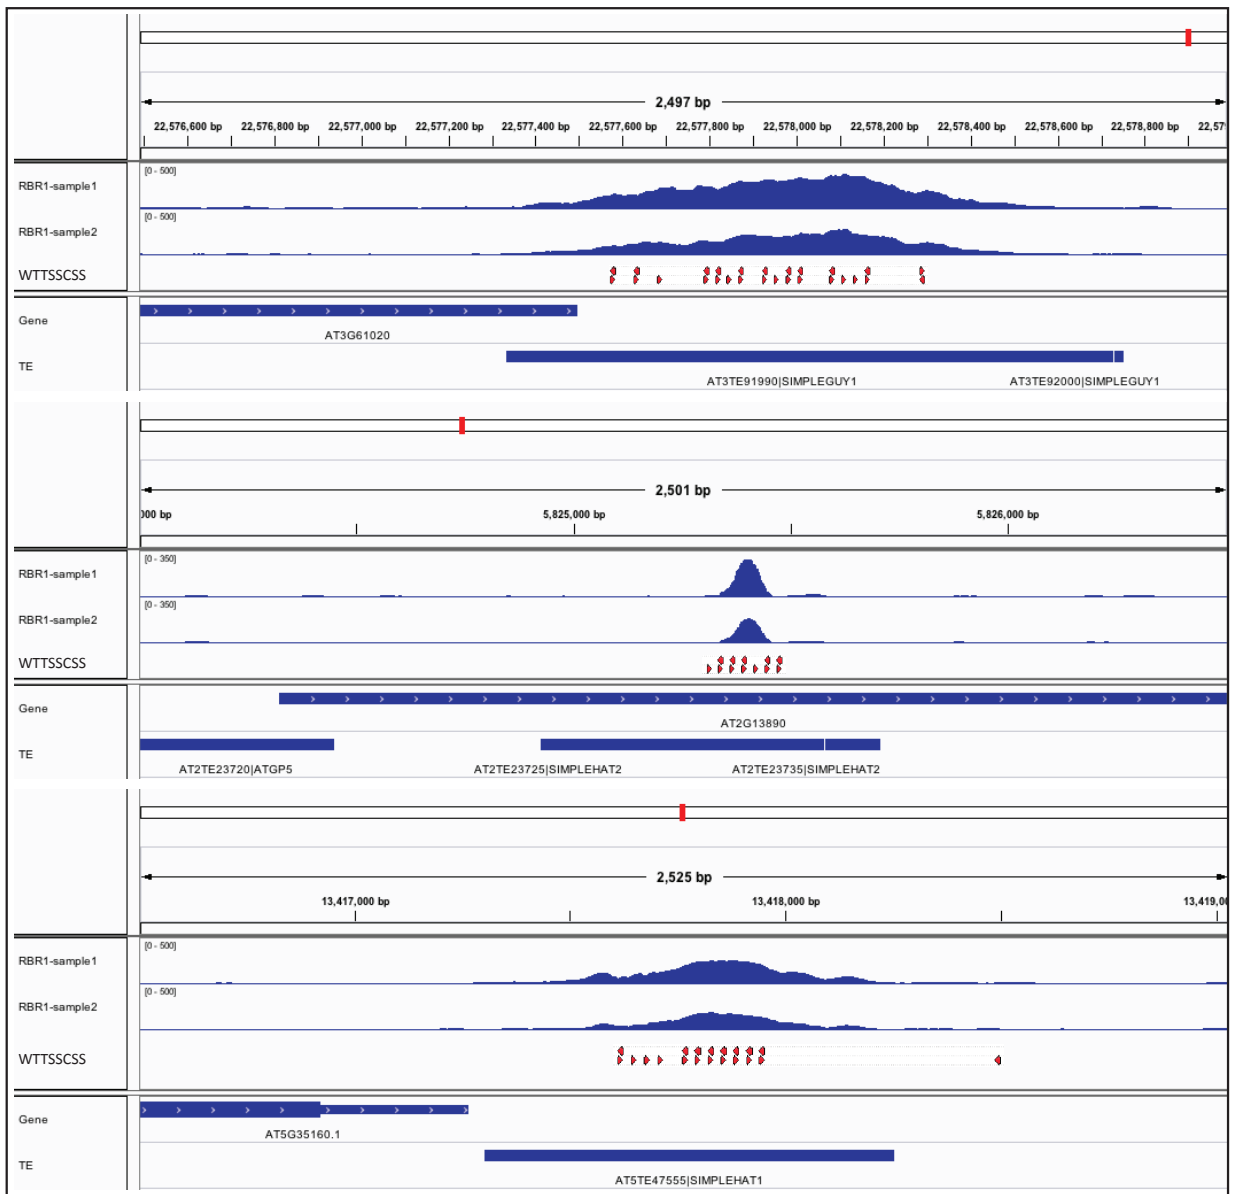**C**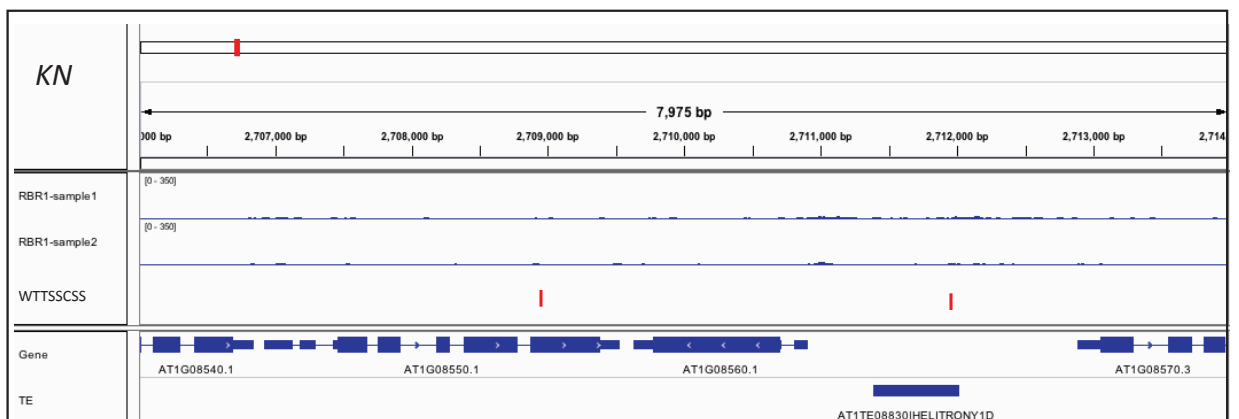

Supplement: pgen.1007797.s002.pdf [file pgen.1007797.s002.pdf]

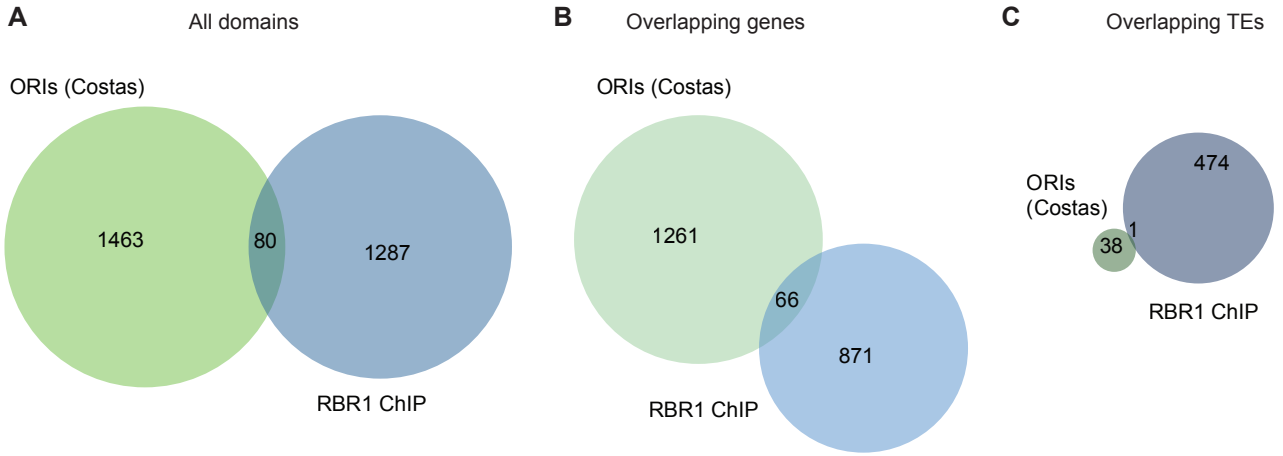

Supplement: pgen.1007797.s003.pdf [file pgen.1007797.s003.pdf]

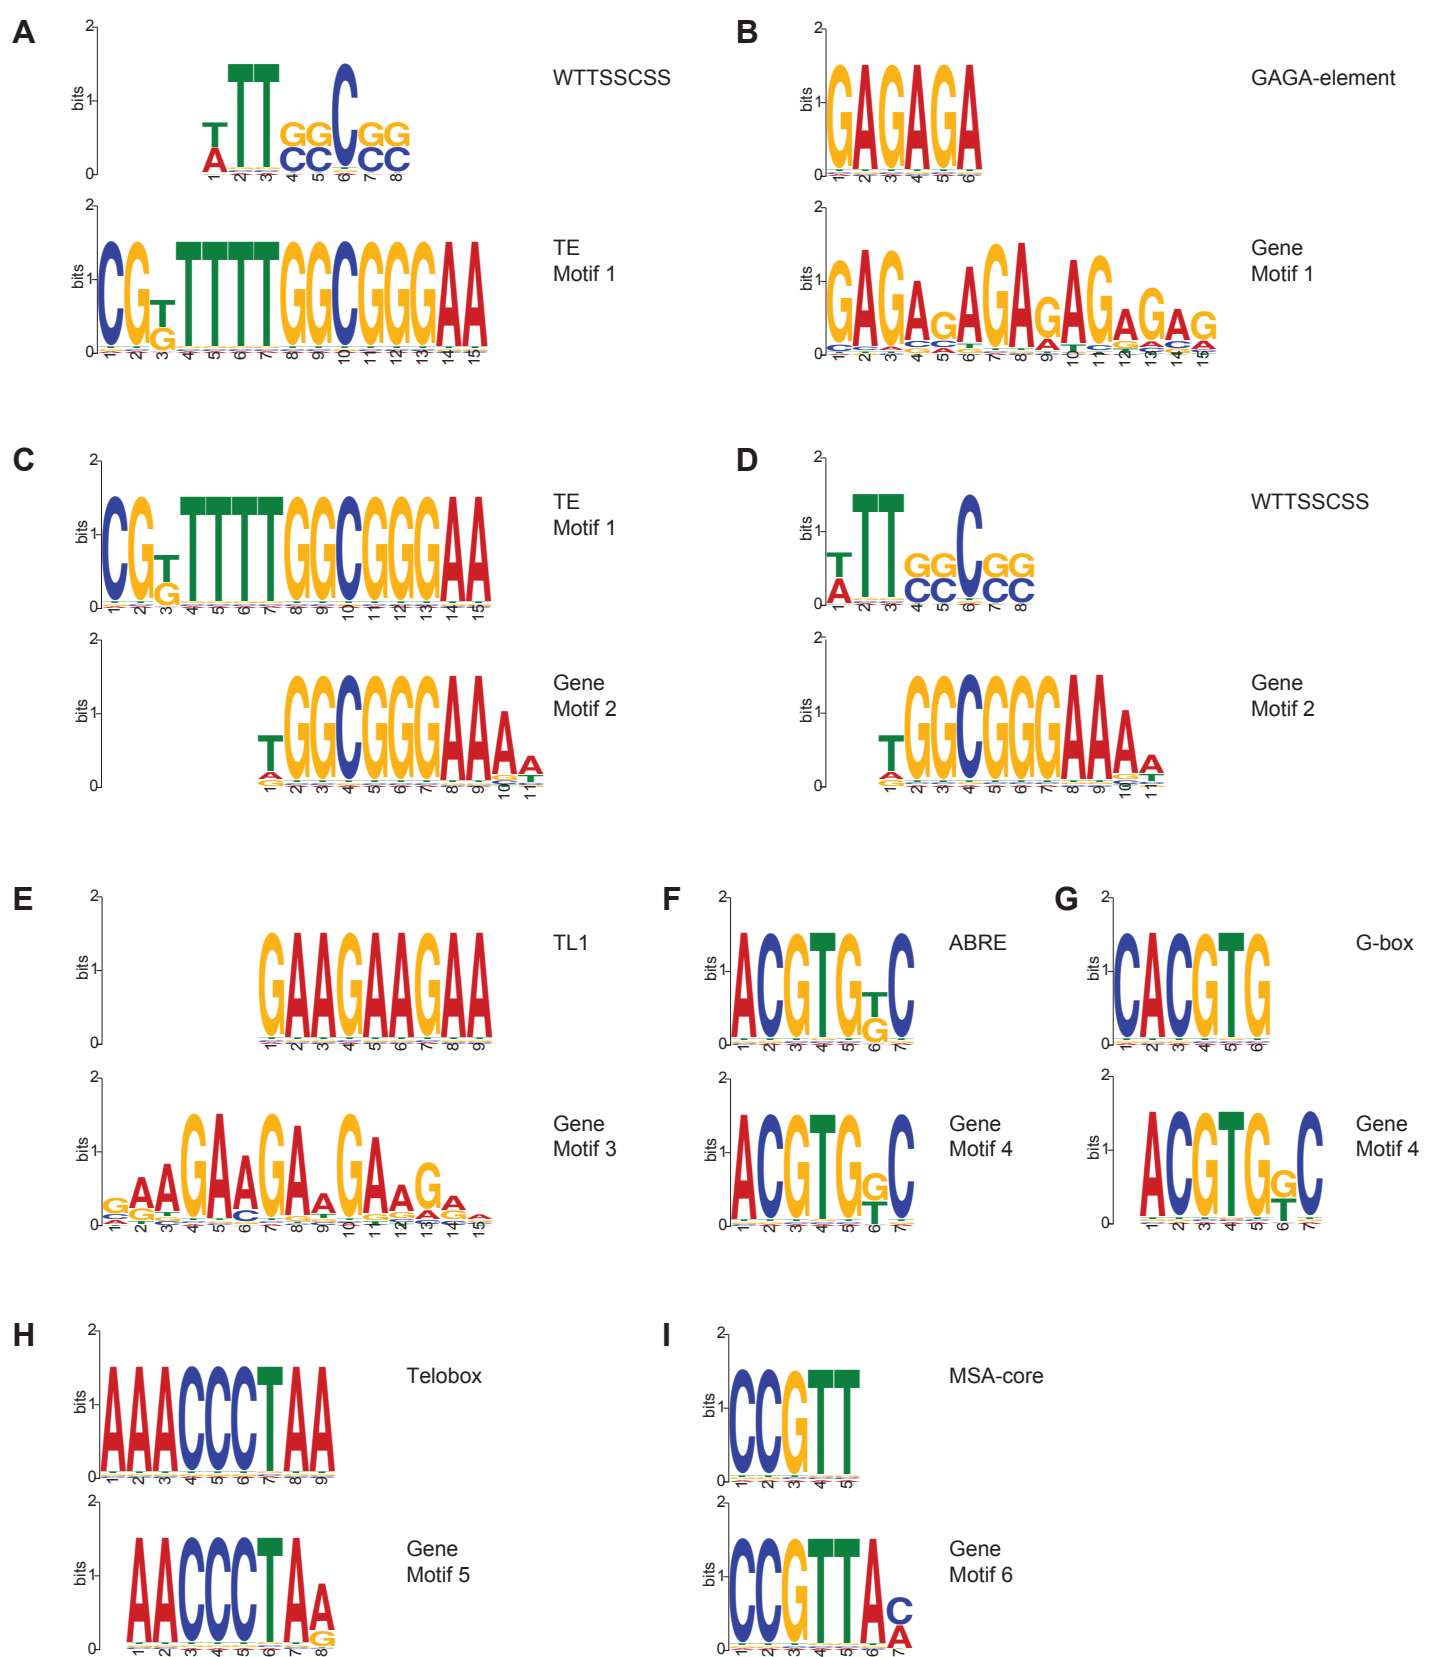

Supplement: pgen.1007797.s004.pdf [file pgen.1007797.s004.pdf]

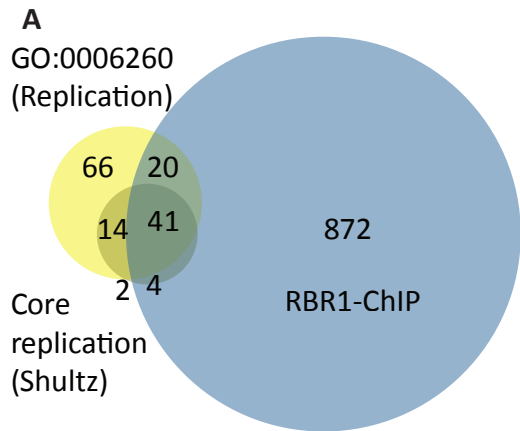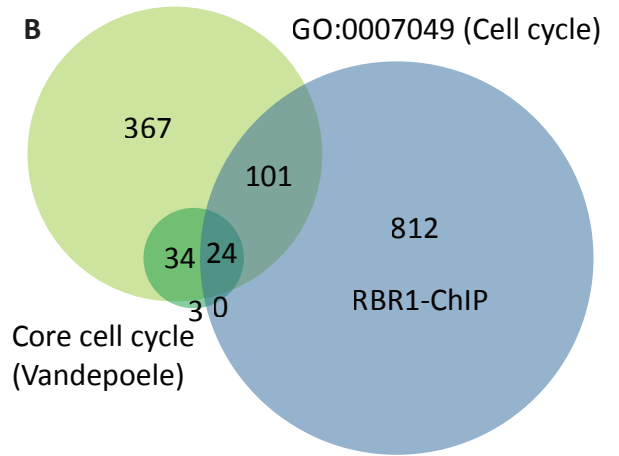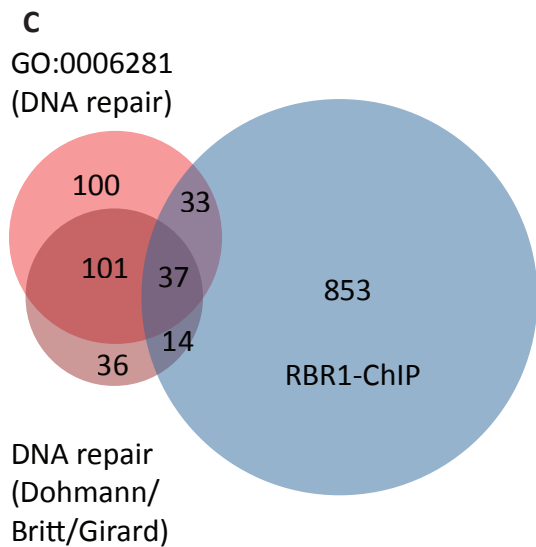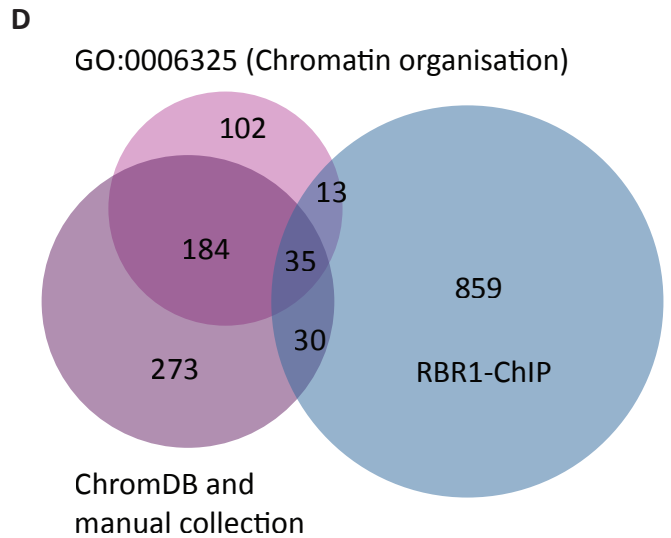

Supplement: pgen.1007797.s005.pdf [file pgen.1007797.s005.pdf]

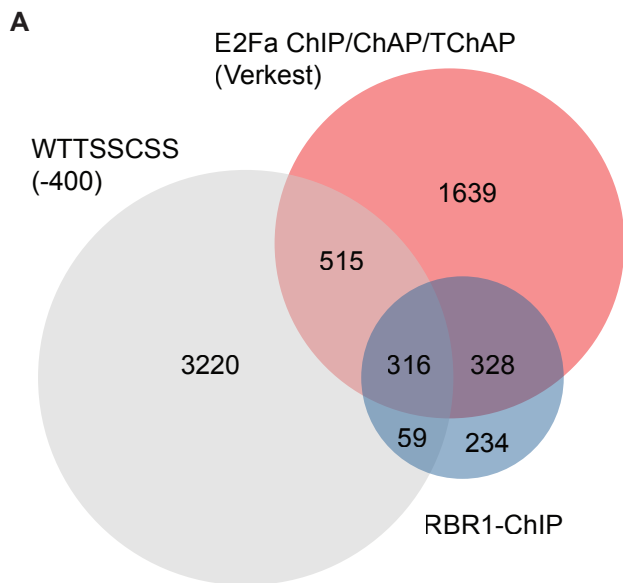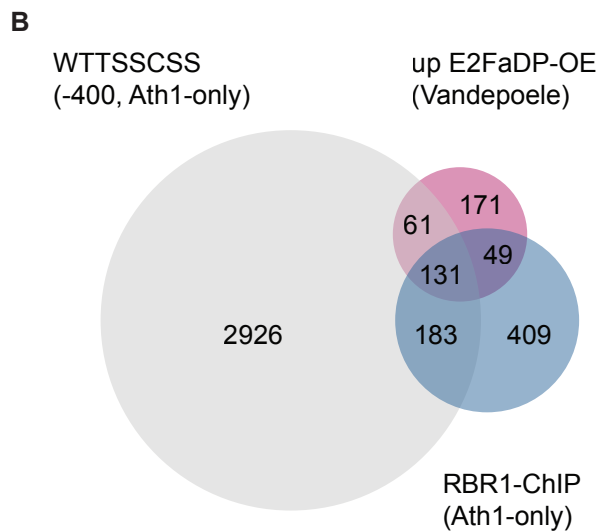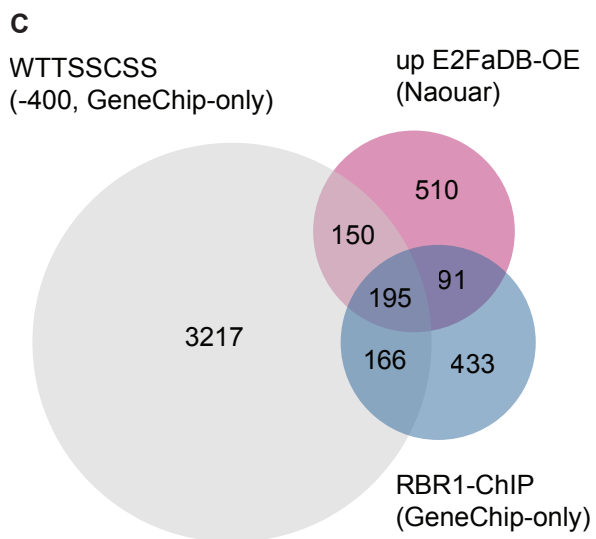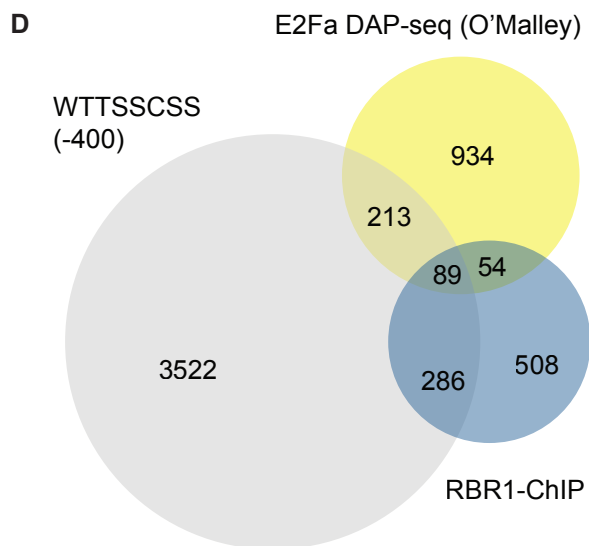

Supplement: pgen.1007797.s006.pdf [file pgen.1007797.s006.pdf]

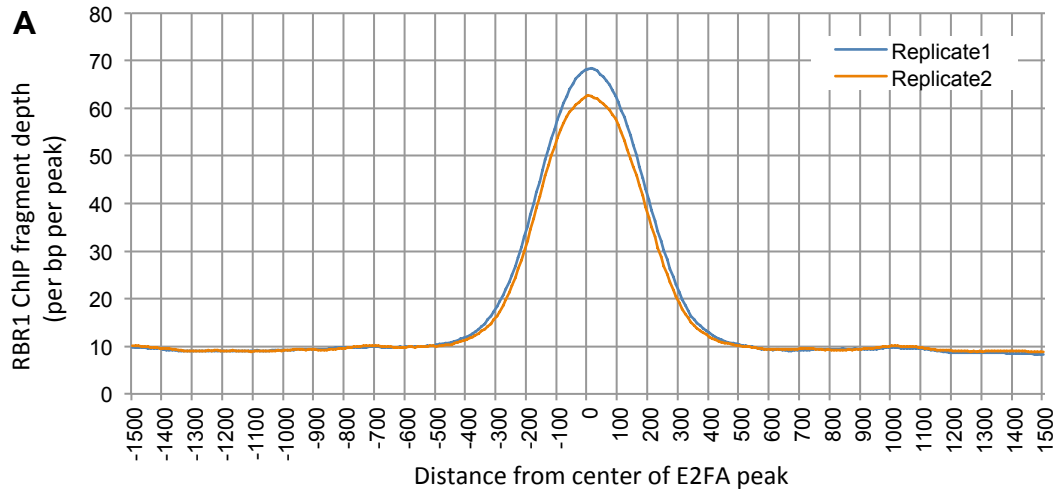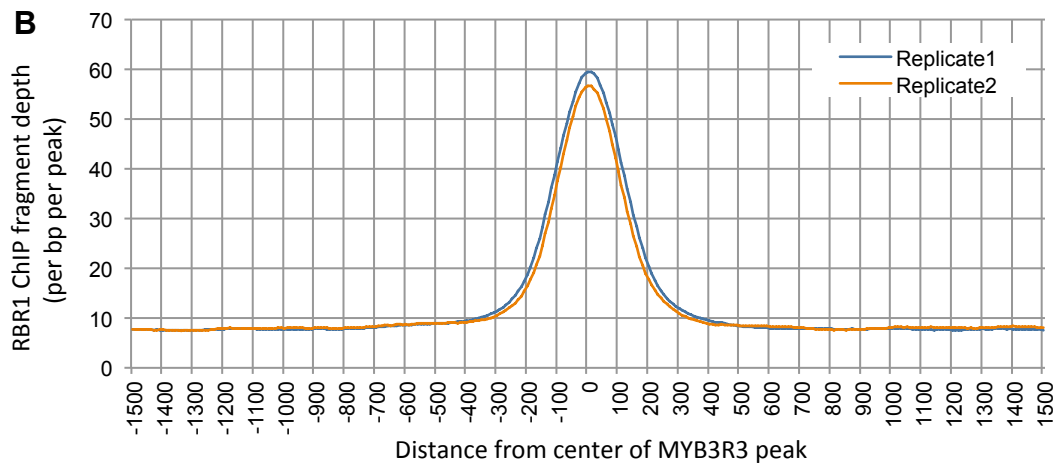

Supplement: pgen.1007797.s007.pdf [file pgen.1007797.s007.pdf]

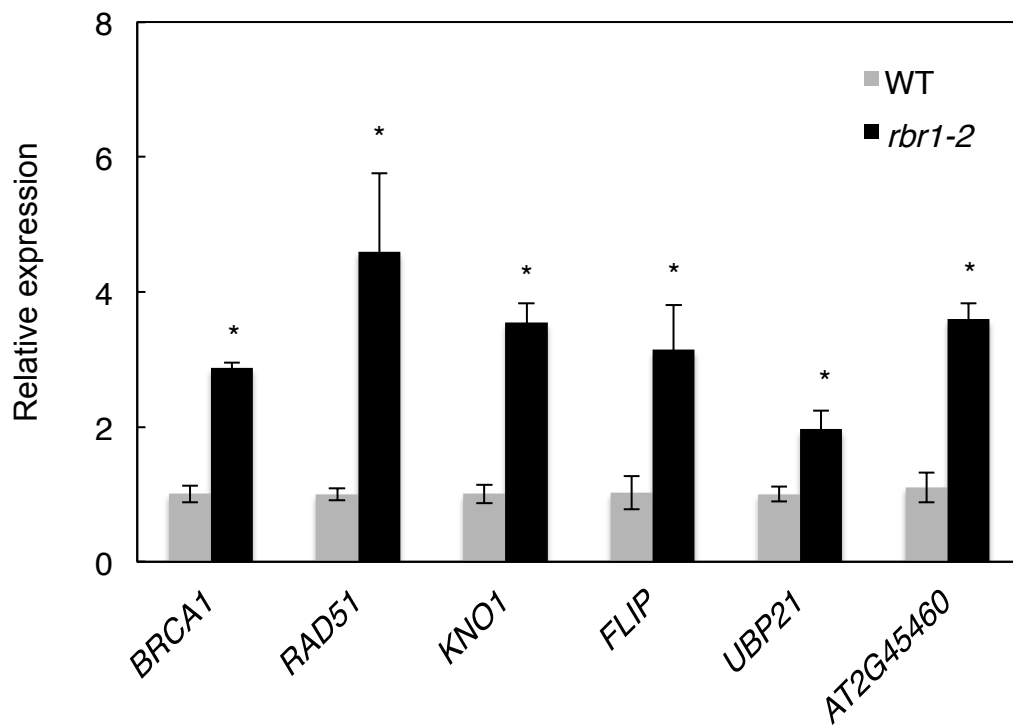

Supplement: pgen.1007797.s009.pdf [file pgen.1007797.s009.pdf]

**A**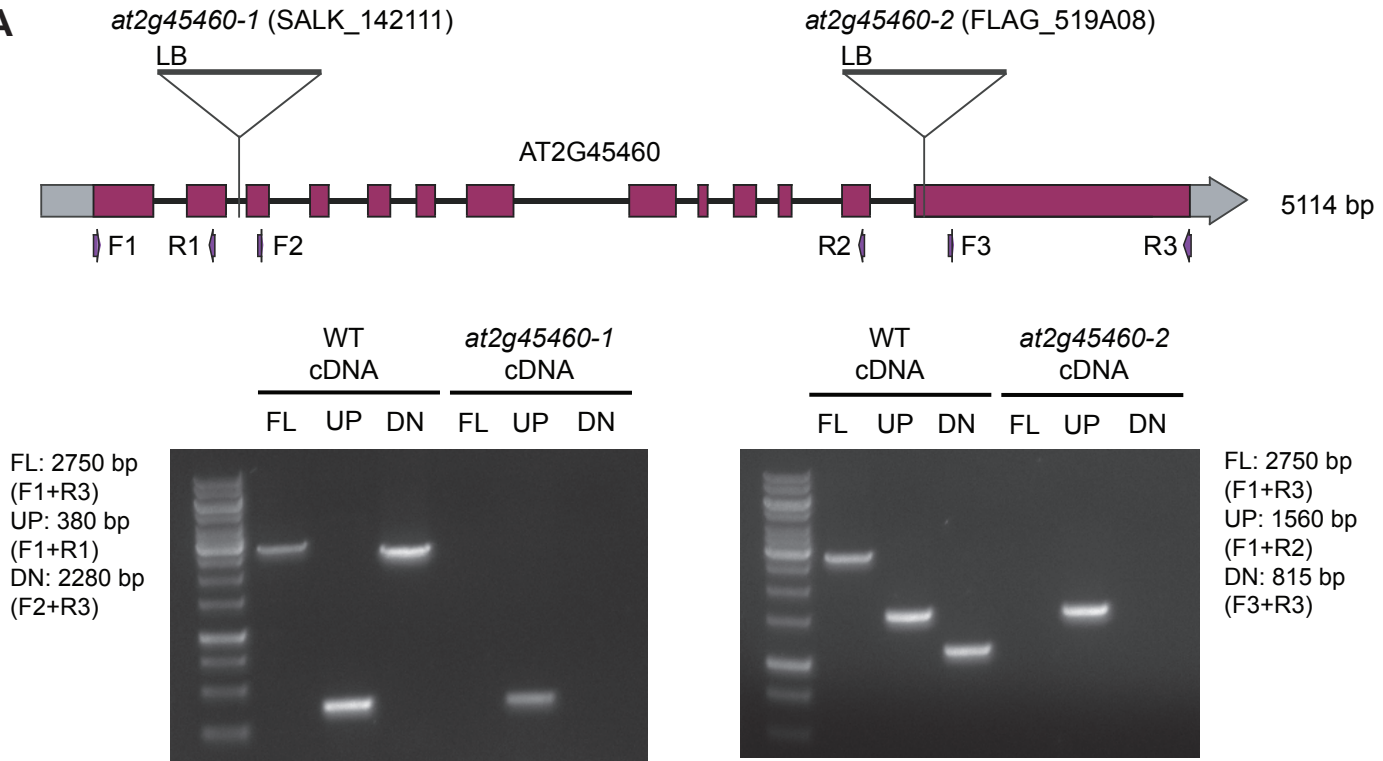**B**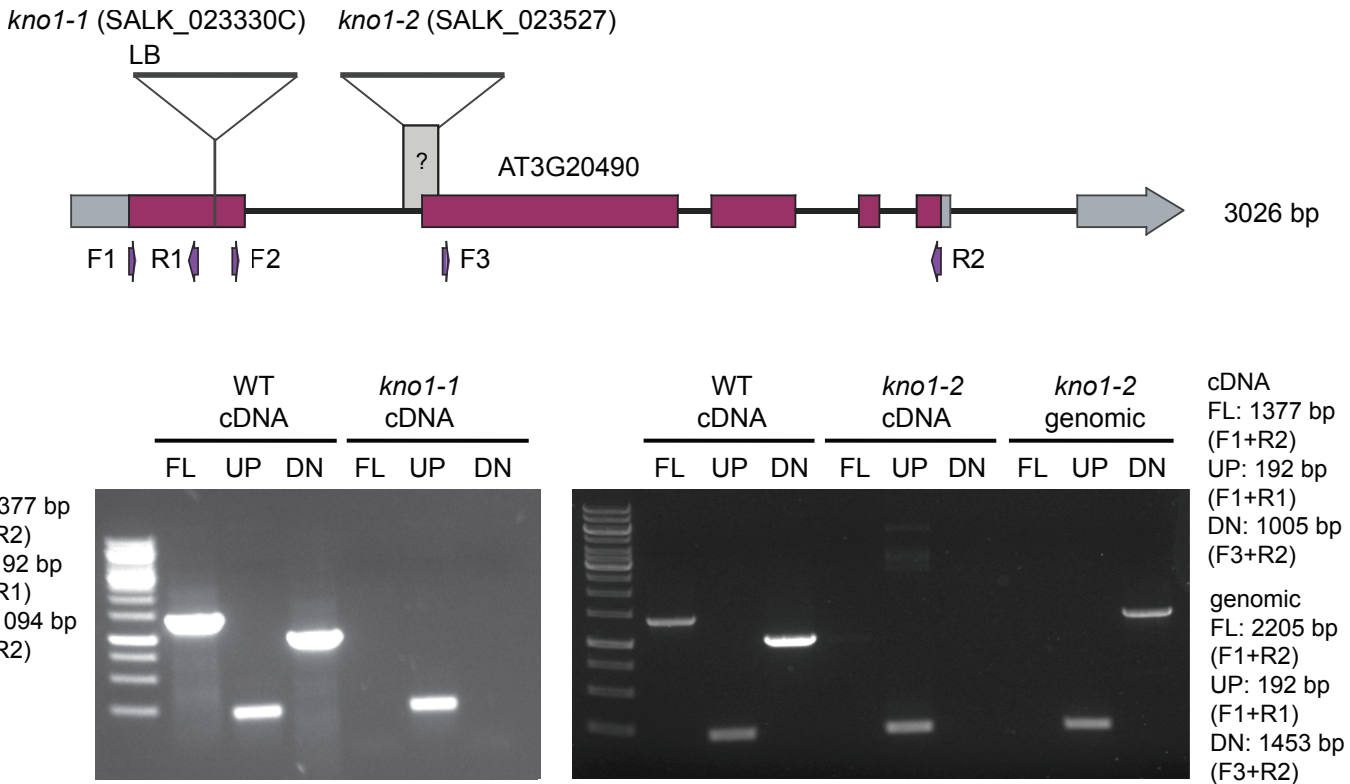

**C**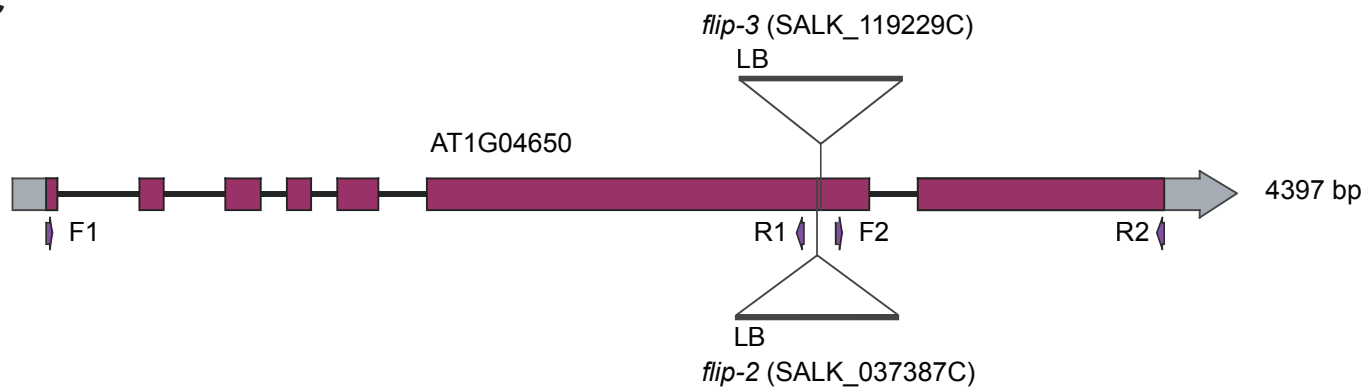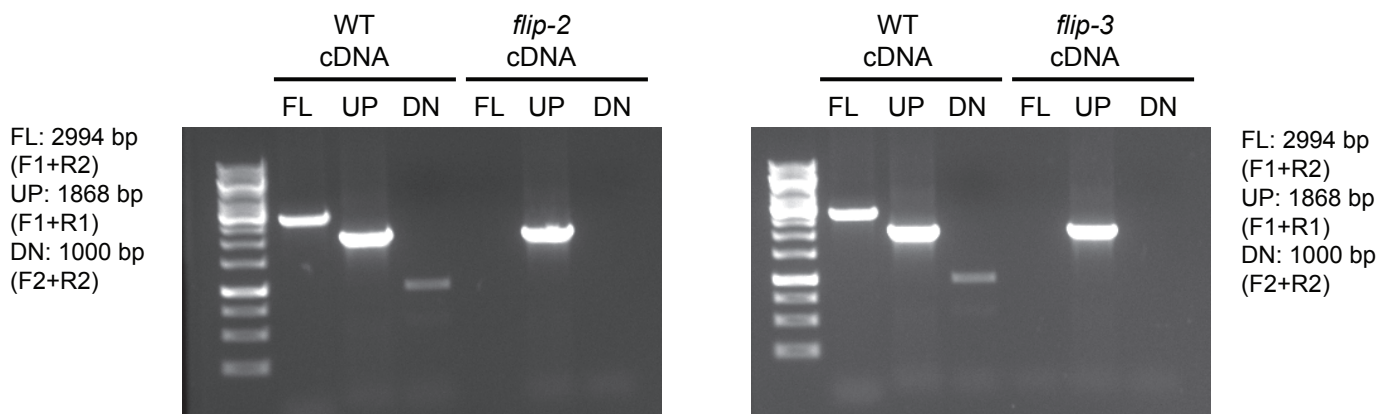**D**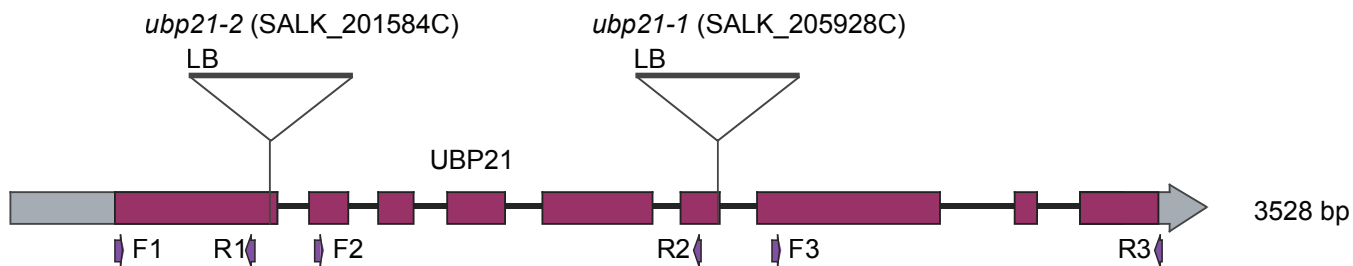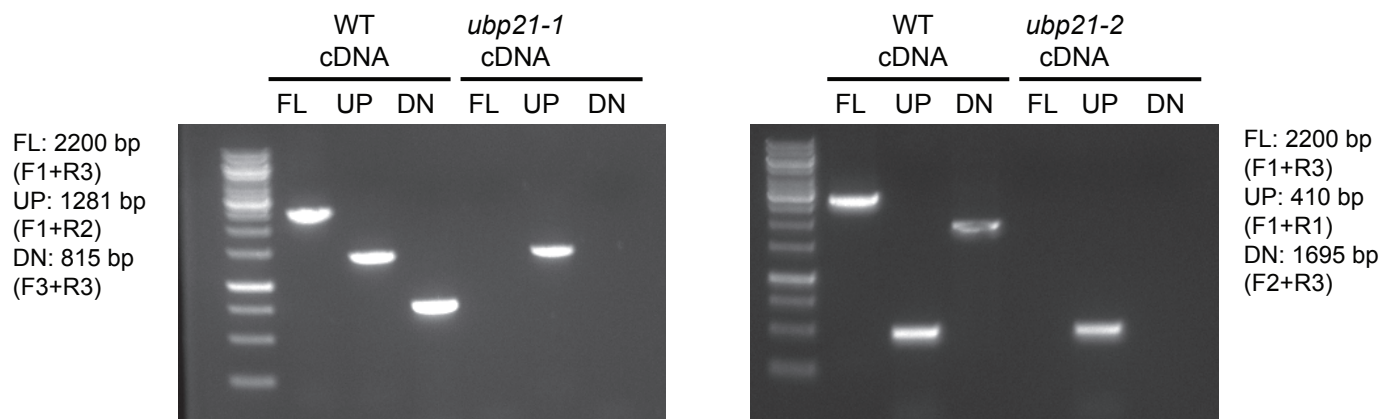

Supplement: pgen.1007797.s010.pdf [file pgen.1007797.s010.pdf]

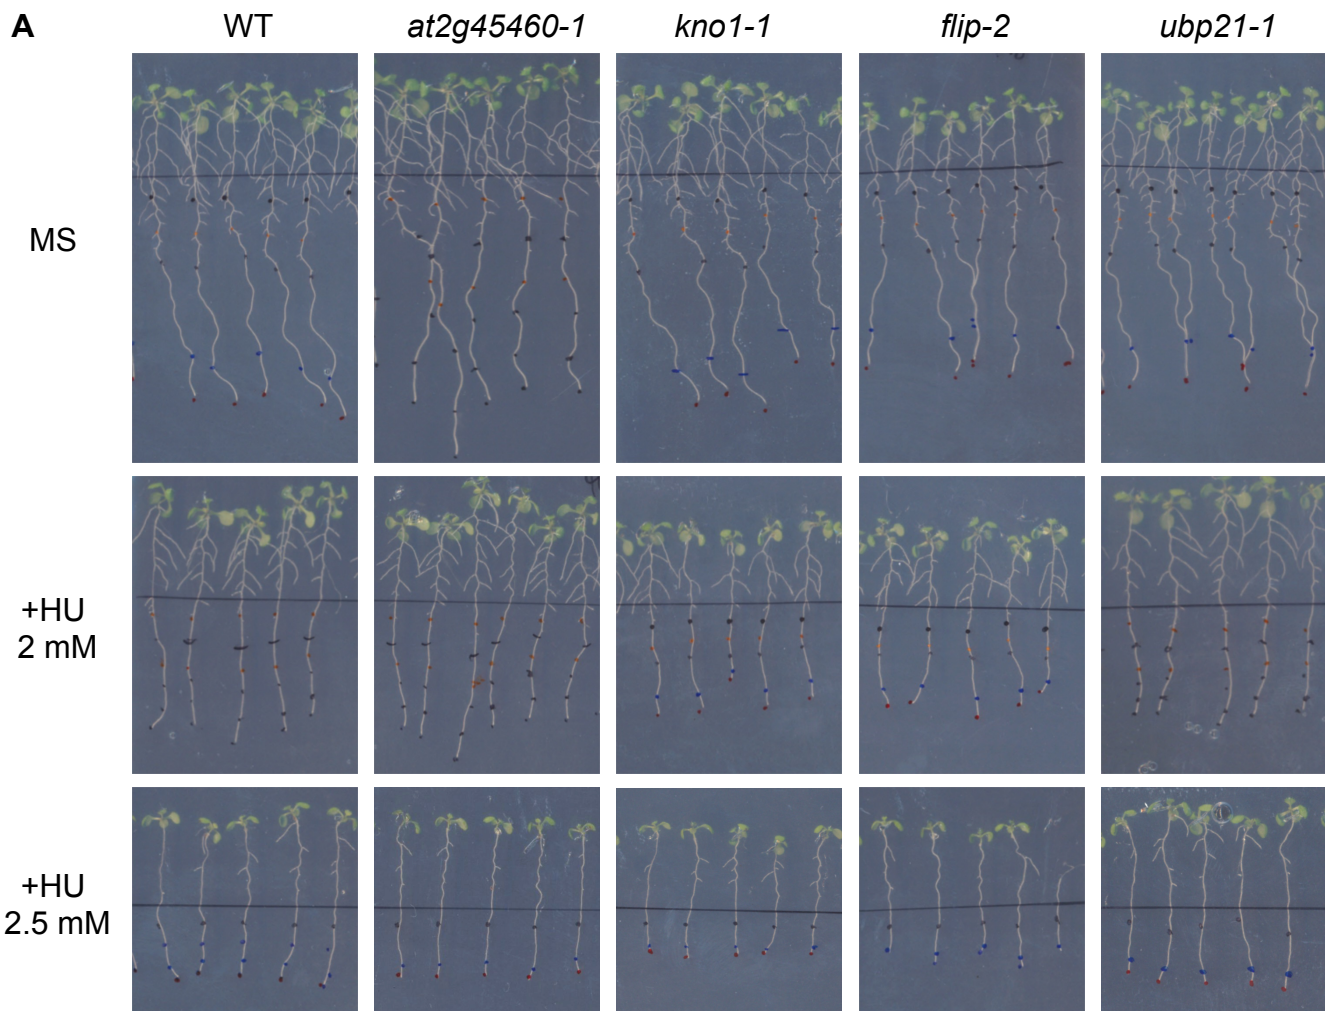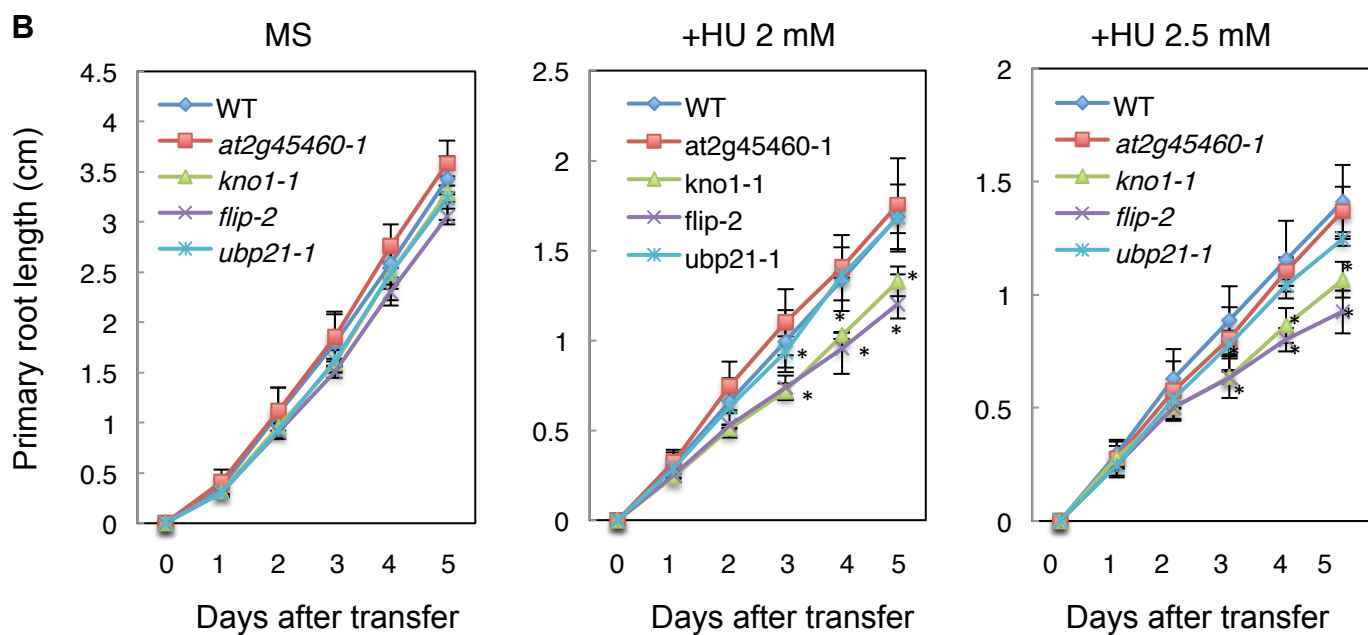

Supplement: pgen.1007797.s011.pdf [file pgen.1007797.s011.pdf]

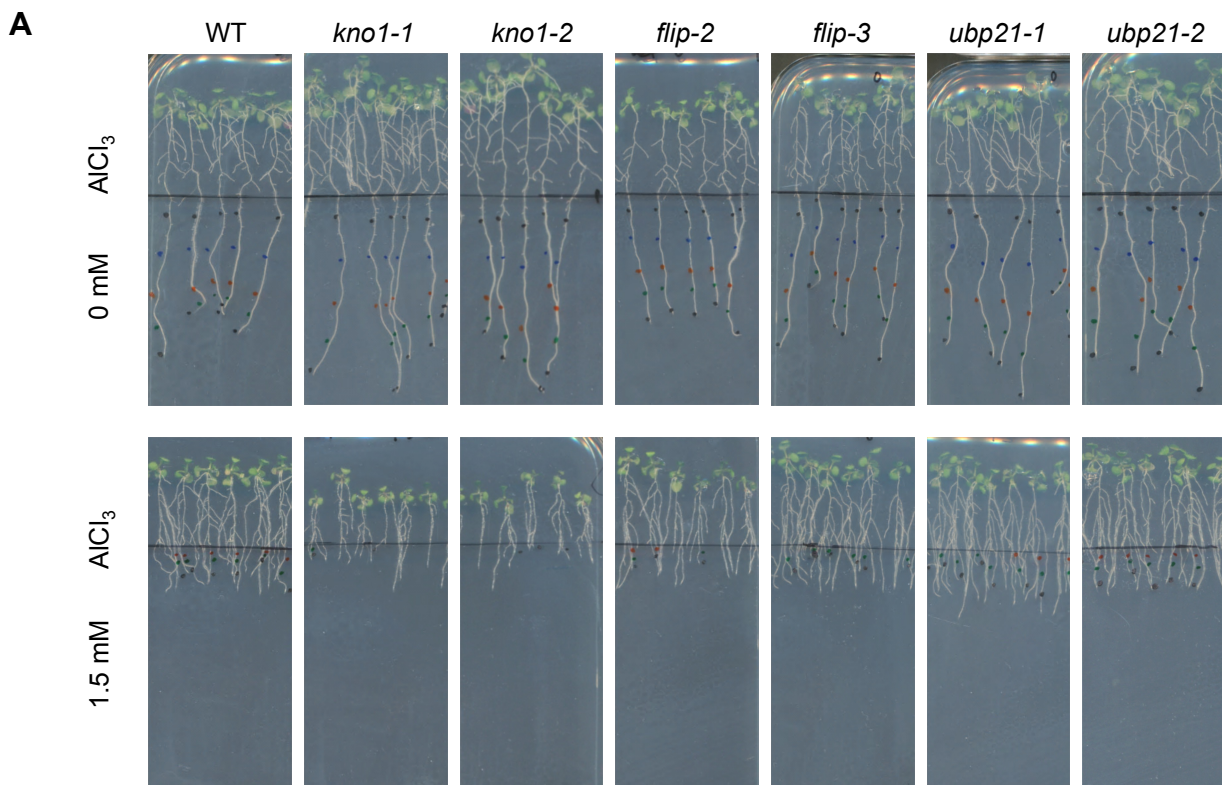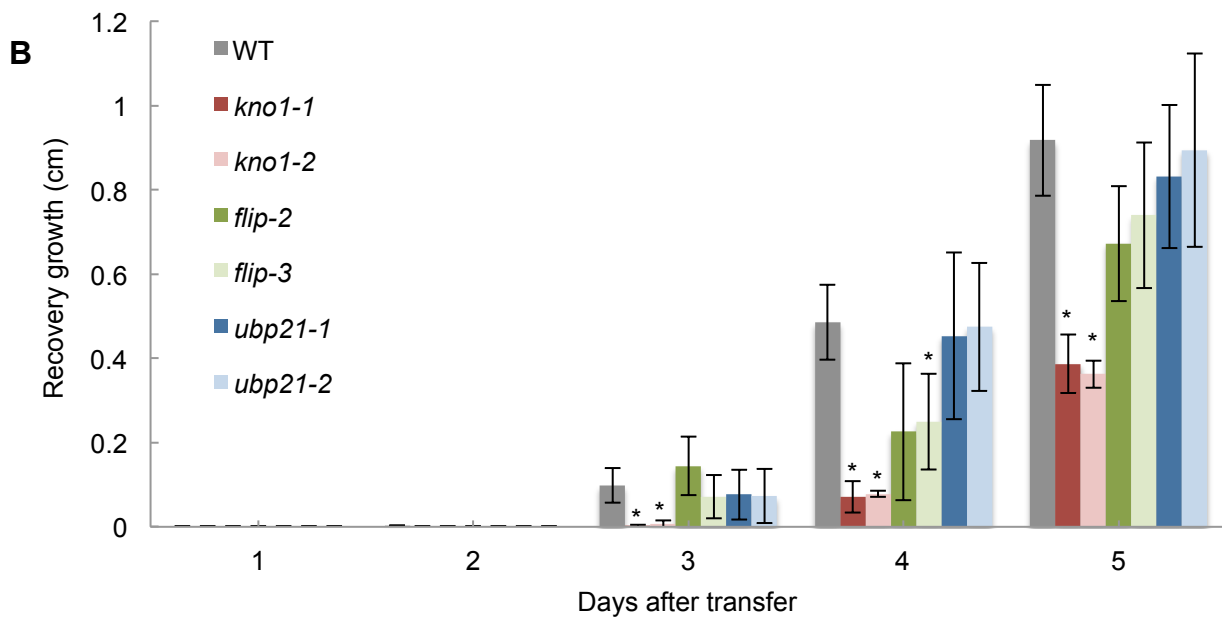

Supplement: pgen.1007797.s012.pdf [file pgen.1007797.s012.pdf]

**A**

H3K27me3-ChIP  
14d seedling  
(Bouyer)

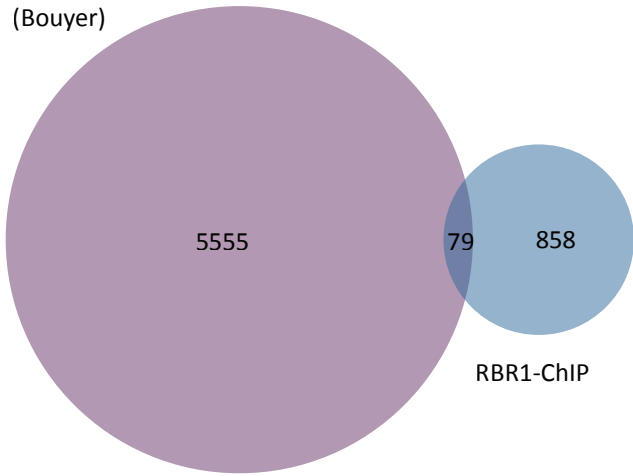**B**

H3K27me3-ChIP  
12d seedlings  
(Deng)

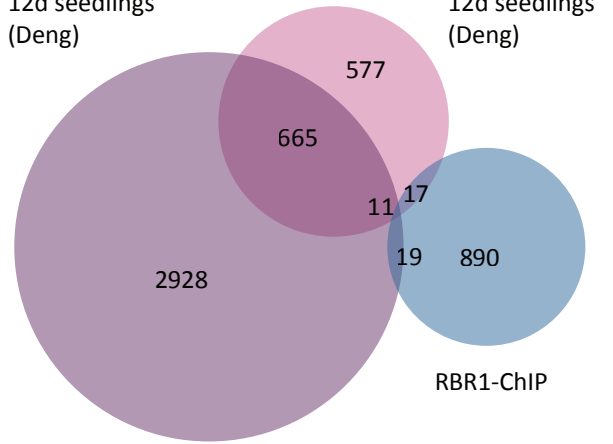**C**

FIE-ChIP  
germinating embryos  
(Xiao)

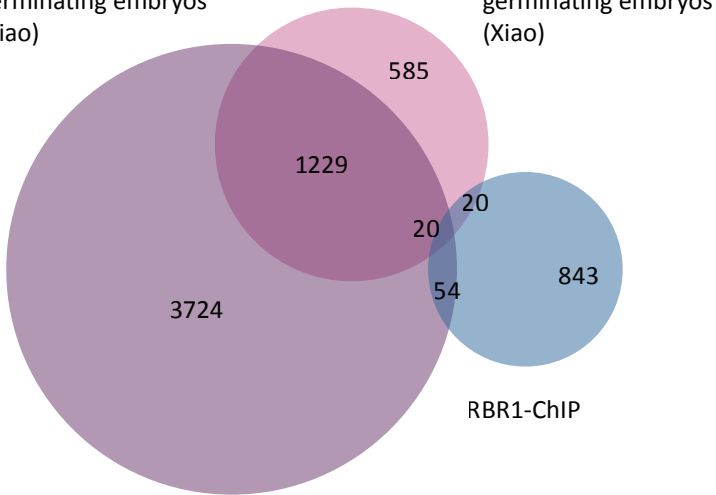

Supplement: pgen.1007797.s013.pdf [file pgen.1007797.s013.pdf]
